# Supplementary material for: Ribonuclease 4 is associated with aggressiveness and progression of prostate cancer
Source: PubMed Central journal article supplement (PMC9233706; doi:10.1038/s42003-022-03597-1), 2022-06-25
Supplement: 42003_2022_3597_MOESM3_ESM.pdf [file 42003_2022_3597_MOESM3_ESM.pdf]

## **Description of Additional Supplementary Files**

**Supplementary Data 1.** Source data used for graphs and charts shown in main figures.

**Supplementary Data 2.** Source data used for graphs and charts shown in supplementary figures.
